# Supplementary material for: Psilocybin and MDMA reduce costly punishment in the Ultimatum Game
Source: PubMed Central journal article supplement (PMC5974271; doi:10.1038/s41598-018-26656-2), 2018-05-29
Supplement: 41598_2018_26656_MOESM1_ESM.pdf [file 41598_2018_26656_MOESM1_ESM.pdf]

1 **Title:** Psilocybin and MDMA reduce costly punishment in the Ultimatum Game

2 **Authors:** Anthony S Gabay<sup>1</sup>, Robin Carhart-Harris<sup>3</sup>, Ndaba Mazibuko<sup>1</sup>, Matthew J  
3 Kempton<sup>1,2</sup>, Paul D Morrison<sup>2</sup>, David Nutt<sup>3</sup>, Mitul A Mehta<sup>1</sup>

4 <sup>1</sup> Department of Neuroimaging, Institute of Psychiatry, Psychology & Neuroscience,  
5 King's College London

6 <sup>2</sup> Department of Psychosis Studies, Institute of Psychiatry, Psychology &  
7 Neuroscience, King's College London

8 <sup>3</sup> Psychedelic Research Group. Neuropsychopharmacology Unit. Centre for  
9 Academic Psychiatry, Imperial College London.

10

## 11 **Supplementary materials**

### 12 **S1: Exclusion criteria for Study One and reasons for participants excluded**

13 Exclusion criteria included: personal history of psychiatric illness (assessed with the  
14 Mini-International Neuropsychiatric Interview, Sheehan et al., 1998); first-order  
15 relative with a history of psychotic illness; evidence of cardiac (assessed with ECG),  
16 hepatic, renal, gastrointestinal (assessed with standard blood screening) or  
17 neurological disorders; excessive use of caffeine (> six cups of coffee per day) and  
18 alcohol (> 28 units per week); current use of medication; failure of drugs of abuse  
19 test at screening or on either study day (drugs tested for: amphetamine, barbiturates,  
20 benzodiazepines, cocaine, THC, methadone, methamphetamine, opiate,  
21 phenylcyclidine, tricyclic antidepressants). Participants were only included in this  
22 study if they had at least one previous experience with a hallucinogenic drug.  
23 Participants were excluded if any previous experience could be described as  
24 'negative', or a 'bad trip'. We did not collect data on lifetime use.

25 Three participants did not complete the study: the QTc reading of one participant's  
26 ECG exceeded the upper limit specified in the study protocol on the day of testing;  
27 one participant experienced high anxiety prior to the psilocybin dosing on his first  
28 session and withdrew from the study; one participant tested positive for cocaine on  
29 the morning of his second session.

### 30 **S2: Full description of the experimental study day for Study One**

31 Participants arrived at the study centre at 08:30, at which time we repeated  
32 neurological, cardiac, and general health safety checks to ensure nothing had  
33 changed since their screening visit. At 10:00 participants were dosed with either  
34 125mg saracatinib or placebo, orally. At 30 minutes and 120 minutes post-dose  
35 participants gave a blood sample. At 180 minutes post-dose participants completed  
36 some questionnaires and were retrained in the tasks they were to perform in the  
37 scanner. At 240 minutes post-dose participants entered the scanner. The scanning  
38 session lasted 90 minutes, with an infusion of 2mg psilocybin over 2 minutes  
39 occurring approximately 40 minutes into the scanning session (280 minutes post  
40 saracatinib).

41 Following the scanning session, a further blood sample was taken and participants  
42 completed a questionnaire of subjective effects, the UG (340 minutes post  
43 saracatinib) and the Affective Bias task (355 minutes post saracatinib). Participants  
44 then completed further questionnaires before commencing discharge procedures.  
45 The study typically finished at around 17:00.

### 46 **S3: Exclusion criteria for Study Two**

47 Exclusion criteria included: personal history of psychiatric illness; first-order relative  
48 with a history of psychotic illness; evidence of cardiac, hepatic, renal, gastrointestinal  
49 or neurological disorders; excessive use of caffeine and alcohol; current use of  
50 medication; failure of drugs of abuse test at screening or on either study day. Only  
51 participants with previous experience of MDMA were included in this study.  
52 Participants were only included in this study if they had at least one previous  
53 experience with MDMA. They were also required to have not used MDMA in the  
54 three months leading up to their involvement in the study. We did not collect data on  
55 lifetime use.

56 One participant withdrew from the study after his first visit. This was unrelated to his  
57 participation, and unblinding revealed that he received placebo.

### 58 **S4: Full description of the experimental study day for Study Two**

59 Participants arrived at the study centre at 08:45, at which time we repeated physical  
60 health screening checks to confirm they were still eligible to take part. At 10:00 a pre-  
61 dose blood sample was taken to assess baseline plasma oxytocin levels. At 10:15

62 participants were dosed with either 100mg MDMA or placebo, orally. At 45 minutes  
 63 post-dose participants gave another blood sample to assess plasma oxytocin and  
 64 MDMA levels. Between these samples participants were retrained in the tasks. At 75  
 65 minutes post-dose participants entered the scanner. The scanning session lasted 90  
 66 minutes, with the first task beginning approximately 20 minutes into the session.  
 67 Prior to the fMRI tasks we collected structural scans, resting state data and arterial  
 68 spinal labelling data. These data are not presented in this manuscript.

69 The timing for the MRI session was chosen because the Tmax of MDMA ranges  
 70 between 1.5 – 3 hours (Kolbrich et al., 2008), and subjective effects peak and remain  
 71 stable between 1 and 3 hours (Harris et al., 2002), meaning functional acquisitions  
 72 would fall within these time points.

### 73 **S5: Full list of offers in the Ultimatum Game used in Study Two**

74 **Table S 1: Table B-1: Full list of UG offers presented in the MDMA study. Ordered by condition and then**  
 75 **percentage of the total stake. Shading reflects unfair (10-20%), fair (45-50%), and hyper-fair (80-90%)**  
 76 **offers. FP: first person; TP: third-party; GS: game server**

| Offer from...  | % of total stake | Total stake | Utility |
|----------------|------------------|-------------|---------|
| <i>Run one</i> |                  |             |         |
| FP             | 10               | 30          | Low     |
| FP             | 10.94            | 32          | Low     |
| FP             | 11.96            | 46          | High    |
| FP             | 13.04            | 11.5        | Low     |
| FP             | 13.05            | 38.3        | High    |
| FP             | 17.11            | 38          | High    |
| FP             | 20               | 5           | Low     |
| FP             | 20               | 37.5        | High    |
| FP             | 46.15            | 6.5         | Low     |
| FP             | 46.67            | 7.5         | Low     |
| FP             | 47.06            | 8.5         | Low     |
| FP             | 47.62            | 10.5        | High    |
| FP             | 48.15            | 13.5        | High    |
| FP             | 49.18            | 12.2        | High    |
| FP             | 50               | 2           | Low     |
| FP             | 50               | 3           | Low     |
| FP             | 80               | 2.5         | Low     |
| FP             | 81.08            | 3.7         | Low     |
| FP             | 82.35            | 8.5         | High    |
| FP             | 84.62            | 6.5         | High    |
| FP             | 86.36            | 11          | High    |
| FP             | 86.67            | 7.5         | High    |

|    |       |      |      |
|----|-------|------|------|
| FP | 90    | 5    | Low  |
| FP | 90.91 | 1.1  | Low  |
| TP | 11.97 | 58.5 | High |
| TP | 13.05 | 38.3 | High |
| TP | 13.16 | 19   | Low  |
| TP | 14.04 | 28.5 | Low  |
| TP | 17.91 | 33.5 | High |
| TP | 19.15 | 23.5 | Low  |
| TP | 20    | 37.5 | High |
| TP | 20    | 5    | Low  |
| TP | 46.67 | 7.5  | Low  |
| TP | 47.37 | 9.5  | Low  |
| TP | 47.62 | 10.5 | High |
| TP | 48.15 | 13.5 | High |
| TP | 50    | 19   | High |
| TP | 50    | 15   | High |
| TP | 50    | 3    | Low  |
| TP | 50    | 2    | Low  |
| TP | 80    | 5    | Low  |
| TP | 82.35 | 8.5  | High |
| TP | 83.33 | 3    | Low  |
| TP | 83.33 | 6    | High |
| TP | 85.71 | 7    | High |
| TP | 88.24 | 1.7  | Low  |
| TP | 88.89 | 9    | High |
| TP | 90.91 | 1.1  | Low  |
| GS | 10    | 30   | Low  |
| GS | 11.97 | 58.5 | High |
| GS | 13.04 | 11.5 | Low  |
| GS | 13.05 | 38.3 | High |
| GS | 14.04 | 28.5 | Low  |
| GS | 17.02 | 47   | High |
| GS | 17.91 | 33.5 | High |
| GS | 20    | 5    | Low  |
| GS | 46.67 | 7.5  | Low  |
| GS | 47.06 | 8.5  | Low  |
| GS | 47.62 | 10.5 | High |
| GS | 49.02 | 5.1  | Low  |
| GS | 49.18 | 12.2 | High |
| GS | 50    | 16   | High |
| GS | 50    | 19   | High |
| GS | 50    | 2    | Low  |
| GS | 80    | 5    | Low  |
| GS | 80    | 2.5  | Low  |

|                |       |      |      |
|----------------|-------|------|------|
| GS             | 83.33 | 6    | High |
| GS             | 84.62 | 6.5  | High |
| GS             | 88.24 | 8.5  | High |
| GS             | 88.89 | 9    | High |
| GS             | 90    | 5    | Low  |
| GS             | 90.91 | 1.1  | Low  |
| <i>Run two</i> |       |      |      |
| FP             | 11.97 | 58.5 | High |
| FP             | 13.16 | 19   | Low  |
| FP             | 14.04 | 28.5 | Low  |
| FP             | 17.02 | 47   | High |
| FP             | 17.91 | 33.5 | High |
| FP             | 17.92 | 53   | High |
| FP             | 18.35 | 10.9 | Low  |
| FP             | 19.15 | 23.5 | Low  |
| FP             | 44.44 | 4.5  | Low  |
| FP             | 47.37 | 9.5  | Low  |
| FP             | 47.83 | 11.5 | High |
| FP             | 48.28 | 14.5 | High |
| FP             | 49.02 | 5.1  | Low  |
| FP             | 50    | 19   | High |
| FP             | 50    | 16   | High |
| FP             | 50    | 15   | High |
| FP             | 80    | 5    | Low  |
| FP             | 83.33 | 6    | High |
| FP             | 83.33 | 3    | Low  |
| FP             | 85.37 | 4.1  | Low  |
| FP             | 85.71 | 7    | High |
| FP             | 88.24 | 8.5  | High |
| FP             | 88.24 | 1.7  | Low  |
| FP             | 88.89 | 9    | High |
| TP             | 10    | 30   | Low  |
| TP             | 10.94 | 32   | Low  |
| TP             | 11.96 | 46   | High |
| TP             | 13.04 | 11.5 | Low  |
| TP             | 17.02 | 47   | High |
| TP             | 17.11 | 38   | High |
| TP             | 17.92 | 53   | High |
| TP             | 18.35 | 10.9 | Low  |
| TP             | 44.44 | 4.5  | Low  |
| TP             | 46.15 | 6.5  | Low  |
| TP             | 47.06 | 8.5  | Low  |
| TP             | 47.83 | 11.5 | High |
| TP             | 48.28 | 14.5 | High |

|    |       |      |      |
|----|-------|------|------|
| TP | 49.02 | 5.1  | Low  |
| TP | 49.18 | 12.2 | High |
| TP | 50    | 16   | High |
| TP | 80    | 2.5  | Low  |
| TP | 81.08 | 3.7  | Low  |
| TP | 84.62 | 6.5  | High |
| TP | 85.37 | 4.1  | Low  |
| TP | 86.36 | 11   | High |
| TP | 86.67 | 7.5  | High |
| TP | 88.24 | 8.5  | High |
| TP | 90    | 5    | Low  |
| GS | 10.94 | 32   | Low  |
| GS | 11.96 | 46   | High |
| GS | 13.16 | 19   | Low  |
| GS | 17.11 | 38   | High |
| GS | 17.92 | 53   | High |
| GS | 18.35 | 10.9 | Low  |
| GS | 19.15 | 23.5 | Low  |
| GS | 20    | 37.5 | High |
| GS | 44.44 | 4.5  | Low  |
| GS | 46.15 | 6.5  | Low  |
| GS | 47.37 | 9.5  | Low  |
| GS | 47.83 | 11.5 | High |
| GS | 48.15 | 13.5 | High |
| GS | 48.28 | 14.5 | High |
| GS | 50    | 3    | Low  |
| GS | 50    | 15   | High |
| GS | 81.08 | 3.7  | Low  |
| GS | 82.35 | 8.5  | High |
| GS | 83.33 | 3    | Low  |
| GS | 85.37 | 4.1  | Low  |
| GS | 85.71 | 7    | High |
| GS | 86.36 | 11   | High |
| GS | 86.67 | 7.5  | High |
| GS | 88.24 | 1.7  | Low  |

77

78

79

80
